# Supplementary material for: A photo-responsive polymeric azopyridine ligand with metal-complexation sensitivity: application to coordination equilibrium studies on the polymer complexes of a cobalt(ii) Schiff base
Source: Royal Society of Chemistry journal article supplement (doi:10.1039/c6py02036d), 2016-12-17
Supplement: c6py02036d1.pdf [file c6py02036d1.pdf]

All text and images must be placed within the frame.

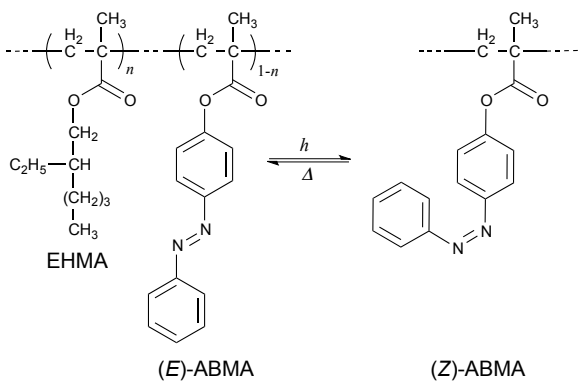

Scheme S1 Chemical structure of P(EHMA-ABMA) and photo-induced *E/Z* isomerization of the ABMA moiety.

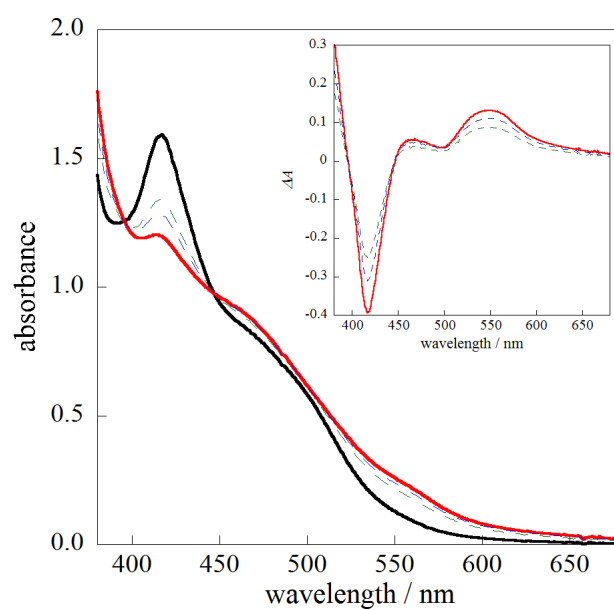

Fig. S1 Change of absorption spectra of toluene solution containing P(EHMA-APMA) and CoS on exposure to oxygen. concentration : [APMA moiety] = 0.05 mM, [CoS] = 0.08 mM; partial pressure of oxygen: 0 (black solid), 175 (green dotted), 380 (blue dotted), 760 Torr (red solid).

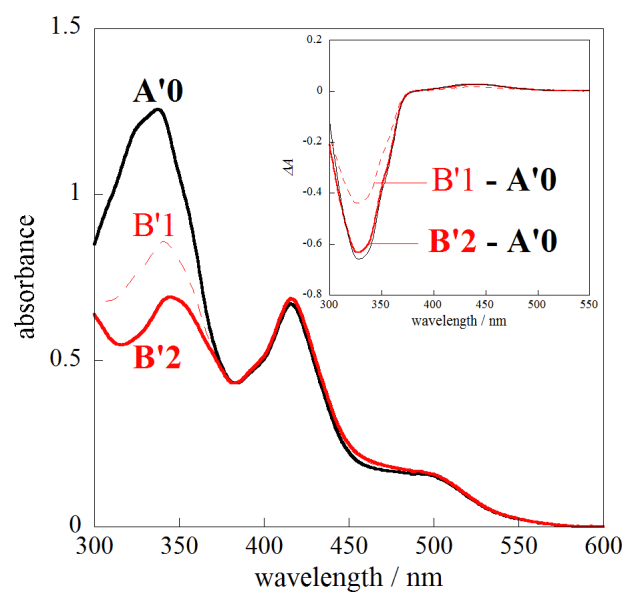

Fig. S2 Absorption spectra of toluene solution containing P(EHMA-ABMA) and CoS in the dark (black), at photo-stationary state (red solid) by irradiating with the 320-nm light ( $1.0 \text{ mW cm}^{-2}$ ), and in the process to reach the photo-stationary state (red dotted) under nitrogen atmosphere. inset: differential spectra between the spectra before (A'0) and after the 320-nm light irradiation (B'1 and B'2). The differential spectrum in black is for another solution containing P(EHMA-ABMA) only.

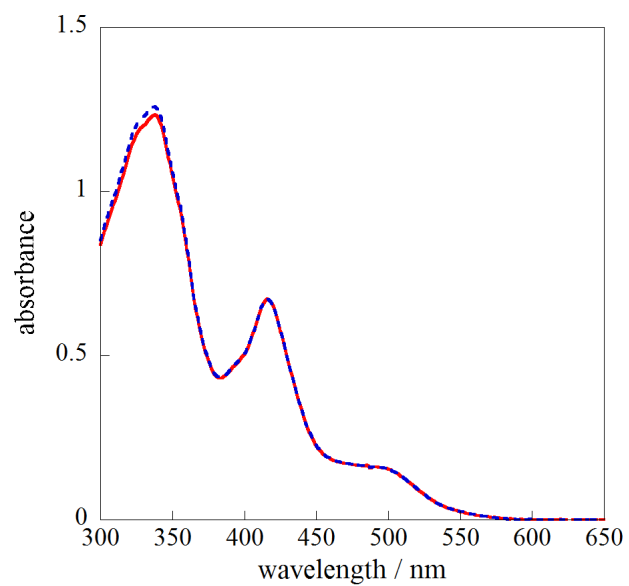

Fig. S3 No change of absorption spectra of toluene solution containing P(EHMA-ABMA) and CoS under nitrogen atmosphere (red) and on exposure to oxygen (blue dotted,  $p_{O_2} = 760$  Torr).

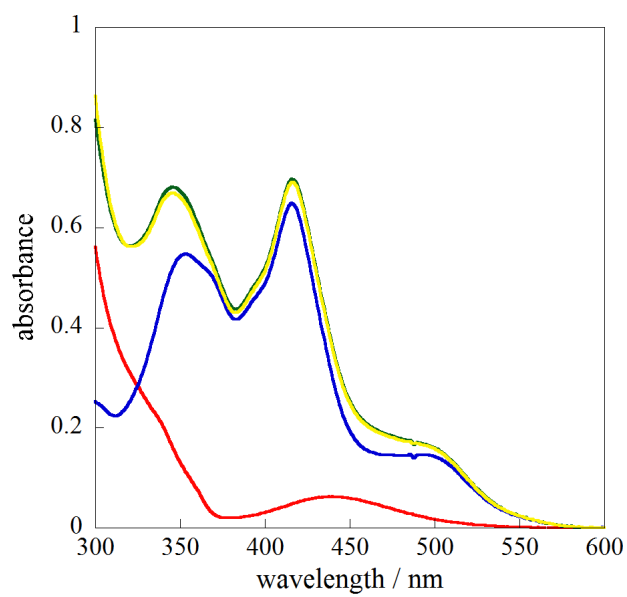

Fig. S4 Change of absorption spectra of solution of P(EHMA-ABMA) throughout the light irradiation with the passage of time after addition of CoS. The spectrum (yellow) observed in a few seconds did not change all through the process. For the other spectra, one was measured with solution of CoS only (blue), another (red) was measured with solution of P(EHMA-(Z)-ABMA) without CoS at photo-stationary state, and the sum (green) of these by simple addition of the two spectra (red + blue).
